# Supplementary material for: Chemistry-climate model SOCOL-AERv2-BEv1 with the cosmogenic Beryllium-7 isotope cycle
Source: Copernicus journal article supplement (doi:10.5194/gmd-2021-56), 2021-04-07
Supplement: Supplementary file [file gmd-2021-56-AC1-supplement.pdf]

We are grateful to the Reviewer for her/his thorough reading and detailed comments that led to an improvement of the manuscript, making it clearer. All the comments are addressed below and highlighted in the revised paper.

#### *“General comments*

*First of all, the authors talk in and there of beryllium isotopes, but when it comes to the presentation of the results, one can find only results for beryllium-7 (which is also in the title), which generates a big confusion in the reader. This is not a major technical flaw, but truly does not help the reader to follow the work. But now let's move with more significant revisions. The Introduction section does not convey successfully the need of this work and in particular of such a model for beryllium isotopes in the atmosphere. I mean, I cannot find there any technical information on the accuracy of previous models, or on the easy-to-use of such models, so there is no way for the reader to compare the model presented here with previous ones, and conclude about its improvement in one or more directions. I would suggest including more details on how previous models present significant gaps (with some data, if possible) so that the reader can understand immediately how this work goes in the direction of filling those gaps.”*

We agree with this comment. We indeed are primarily focused on modelling of  $^7\text{Be}$  isotope as it provides a direct test for the beryllium production+transport+deposition model. On the other hand, in the future, we aim at full modelling of  $^{10}\text{Be}$  isotope which is produced and transported similarly to  $^7\text{Be}$  with only different decay time. That is needed for reconstructions of long-term solar variability and extreme SEP events. We are not aware of any directly validated full production+transport+deposition model of beryllium isotopes, that can be readily applicable to an analysis of past records, viz. without known meteorological data fields. We report such a model here, where the validation is performed vs.  $^7\text{Be}$  data. Since our primary goal is a validation of the beryllium model with the eventual application for  $^{10}\text{Be}$  data, we are focused mostly on high-latitude regions and annual time scales. We have *revised the Introduction* accordingly and added *Section 2 "Summary previous and existing models"*. We hope it is clearer for a reader now.

*“Moving to the validation of the model comparing the simulated values with observations at four stations in both hemispheres, which to me should be presented before the results of a particular event such as the SEP, I can see some limitations in the discussion and in the presentation of the accuracy, which is far from being fully validated as stated in the abstract and in and there in the manuscript. Indeed, the plots comparing simulated and observed values highlight that the model is not fully capable to catch the interannual variability, and especially in the southern hemispheres does not describe the observed pattern. The analysis of linear correlation coefficients and their significance is limited in this sense, since it does not provide information on the presence of biases but only on the similarity of the reproduced patterns. Additional statistical parameters would be needed to correctly conclude about the presence of biases. In addition, the discussion of the correlation coefficients for stations located in the southern hemisphere is affected by significant flaws. Indeed, the low correlation coefficient found at these stations does not derive from the absence of a seasonal pattern, but instead highlights that the model is completely incapable to correctly describe the variability of near-ground concentrations at those stations. The reasons of these disagreements, which may actually depend on a number of physical factors including an incorrect reproduction of deposition or transport, are not sufficiently investigated.”*

We agree that neither cross-correlation nor wavelet coherence can provide information about possible biases, and we have added a new plot (*see Fig. 11*) showing the distribution of the residual difference between the modelled and measured  $^7\text{Be}$  data. One can see that the null hypothesis of no

bias (the mean difference is indistinguishable from zero) cannot be rejected at any significance level, implying no bias even for the southern-hemisphere stations. Thus, both the time variability (coherence) and the absolute levels (no bias) of the data are reproduced by the model.

Also, the authors did not present anything of the meteorological data used in this chemistry-climate model, on which some of the disagreements between simulations and observations may actually depend. Indeed, even though the authors state that a gaseous deposition was adopted for beryllium isotopes, which is not sufficiently explained given that in reality beryllium isotopes travel attached to fine-sized aerosols and is thus mainly removed by wet deposition, they have searched for aerosol data when it came to explain some biases.

CCM SOCOL uses ECHAM5 (*see lines 174-175*) nudged with ERA5 (eraiaT42L39) reanalyses. ERA5 is the fifth generation ECMWF atmospheric reanalysis data of the global climate covering the period from January 1950 to the present. ERA5 data are available on the Copernicus Climate Change Service (C3S) Climate Data Store: <https://cds.climate.copernicus.eu/#!/search?text=ERA5&type=dataset>.

We improved the description of the transport as well as dry and wet deposition (*see lines 270-273, 275-278*). It can be found in the updated text and answers to the second reviewer.

The discussion of the SEP event is far from being reasonable and well-given. Indeed, the fact that near-ground concentrations remain quite low, and that high beryllium concentrations increase only in the upper atmospheric layers, probably result from the particular meteorology of the period, which probably did not favor the transport of such high concentrations to the lower tropospheric layers. In addition, the discussion of the dependence on transport is achieved only by a shift of the date of the event to a different season, without giving additional details about the particular synoptic situation characterizing those days, which leaves the interpretation of the differences between the results mostly qualitative and somehow arbitrary.

It is known that extreme SEP events in the past can be studied using  $^{10}\text{Be}$  isotope in polar ice cores (e.g., Usoskin et al., 2006; Mekhaldi et al., 2015; Sukhodolov et al., 2018) that typically have the (pseudo)annual resolution. Here we wanted to check, both theoretically and experimentally, whether a weaker (strong but not extreme) SEP event can be observed in high-resolution beryllium data. As far as we know this question has not been fully addressed earlier. Moreover, as our modelling shows, the effect of a SEP event on the near-ground beryllium concentrations slightly depends on the season, because of the different patterns of the large-scale dynamics. During Summer-Autumn, the low tropopause and decreased static stability of the troposphere permit a more direct coupling with the upper atmosphere opening a path for the input of the polar stratospheric beryllium to lower levels. In contrast, in Winter-Spring, the tropopause rises, and intense radiative cooling stratifies the lower troposphere closing this route.

To conclude, the authors present lots of technical details which pertain to the methods sections (e.g., information on measurement methods for beryllium, but also modeling information) in the results. I would suggest restructuring the paper to include those details in the methods so that the results section contains only the findings of this work and their appropriate discussion.

We agree and have restructured the manuscript accordingly. Information on measurement methods for beryllium now in *Section 3*.

#### Specific comments

1) Title: I suggest including additional information in the title, such as: "Evaluation of..." or "Chemistry-climate ...: description and evaluation", so that the title is more self-explanatory.

We included additional information in the title: “*Application of Chemistry-climate model SOCOL-AERv2-BEv1 to cosmogenic beryllium isotopes: Description and validation for polar regions.*”

2) Line 1: is “probe” the most appropriate term? Wouldn’t it be better to talk about “tracer”?

It has been replaced with “tracer” (*see line 1*).

3) Lines 3-4: What do you mean by “such ready-to-use model”?

We mean that there were some earlier ad-hoc modelling efforts to demonstrate the ability of CCMs to model beryllium transport and deposition, but a user cannot use such models for other conditions because they are not readily available for a re-run. We cannot give full details in the abstract but explain them in the Introduction (*see lines 100-102*).

4) Lines 4-5 and following: Here you are talking about “isotopes of beryllium”, but previously and in the title you were just referring to beryllium-7. Please check and modify as appropriate.

The model is applied to both  $^7\text{Be}$  and  $^{10}\text{Be}$  isotopes which are assumed to be transported and deposited similarly and only vary in decay. Thus, the model is indeed dealing with the isotopes of beryllium. However, since the high-precision measurements in air exist only for  $^7\text{Be}$ , we mostly discuss that. On the other hand,  $^{10}\text{Be}$  is discussed in the sense of SEP (*see Section 5.2*). We have clarified the text.

5) Lines 5-6: Which isotopes of beryllium?

Both  $^7\text{Be}$  and  $^{10}\text{Be}$  – see item 4 above.

6) Please use either  $^7\text{Be}$  or beryllium-7 all along the text to be consistent throughout the article.

Done,  $^7\text{Be}$  is used.

7) Line 10: It is not clear which meteorological fields were used (from which model/reanalysis/...)

CCM SOCOL uses ECHAM5 nudged with ERA5 (era42L39) reanalyses (*see lines 174-175*).

8) Lines 13-14: perhaps you could insert some statistical parameters proving your statements about the agreement of model simulations with the observations.

The model results agree with the measurements in the absolute level within error bars, implying that the production, decay and lateral deposition are correctly reproduced by the model (confidence level above 95%). We cannot provide more details in the abstract, but they are given in the main text (*see Fig. 10*).

9) Line 16: it is not clear what you mean by “dominating data in the Northern Hemisphere”.

This means that the short-term variability of  $^7\text{Be}$  data in the N-hemisphere is dominated by the annual cycle (*see Figs. 1a and 1b*), while the annual cycle is hardly observed in the S-hemisphere. This pattern is well reproduced by the model.

10) Lines 26-27: Rephrase, this sentence is not clear.

The sentence has been changed (*see lines 34-35*).

11) Lines 34-36: The two sentences are quite obscure. Perhaps you could rephrase them as.

We have revised the Introduction.

12) Lines 45-46: Could you provide some more details of the comparison of the model simulations with measurements (e.g., how many locations were compared?) and about the agreement between the model and the observations? This would provide the reader with indications and needs (or not) of the model presented in this paper.

The text has been updated now (see lines 72-77).

13) Lines 47-48: Same as above, could you provide more details on this experiment and its results?

The text has been updated now (see lines 81-90).

14) Lines 50-51: This sentence is quite obscure. In particular, it is not clear to me which feature is shared by the works of Pacini et al., 2011 and Brattich et al., 2020: indeed, while the first one presents an investigation of the depositional processes of  $^7\text{Be}$ -carrying aerosols in the troposphere using a combination of isotopic data with the numerical CRAC:Be7 model of cosmogenic production, the second one investigates the relationship between advection pathways and atmospheric composition (including natural radionuclides of terrestrial and cosmogenic origin) at a high mountain station, using back-trajectory cluster analysis. Possibly, the authors were referring to works like the ones of Liu H. et al. (e.g., Liu, Hongyu, Daniel J. Jacob, Isabelle Bey, and Robert M. Yantosca. 2001. "Constraints from  $^{210}\text{Pb}$  and  $^7\text{Be}$  on Wet Deposition and Transport in a Global Three-Dimensional Chemical Tracer Model Driven by Assimilated Meteorological Fields." *Journal of Geophysical Research: Atmospheres* 106 (D11) (June 16): 12109–12128. doi:10.1029/2000jd900839; Liu, H., Considine, D., Horowitz, W., Crawford, J., Rodriguez, S., Strahan, M., Damon, S., Steenrod, X., Xu, X., Kouatchou, J., Carouge, C., Yantosca, R. M., (2016). Using beryllium-7 to assess cross-tropopause transport in global models. *Atmos. Chem. Phys.* 16, 4641-4659, doi:10.5194/acp-16-4641-2016) or to other works from Brattich E. et al. (Brattich, E., Liu, H., Tositti, L., Considine, D. B., and Crawford, J. H.: Processes controlling the seasonal variations in  $^{210}\text{Pb}$  and  $^7\text{Be}$  at the Mt. Cimone WMO-GAW global station, Italy: a model analysis, *Atmos. Chem. Phys.*, 17, 1061–1080, <https://doi.org/10.5194/acp-17-1061-2017>, 2017; Brattich, E., Liu, H., Zhang, B., Hernández-Ceballos, M. Á., Paatero, J., Sarvan, D., Djurdjevic, V., Tositti, L., and Ajtić, J.: Observation and modeling of high  $^7\text{Be}$  events in Northern Europe associated with the instability of the Arctic polar vortex in early 2003, *Atmos. Chem. Phys. Discuss.* [preprint], <https://doi.org/10.5194/acp-2020-1121>, in review, 2021). If not, better clarifications of the links between the two cited papers from Pacini et al. and from Brattich et al. should be provided in the text.

We mean that the discussed models are based on either a simplified 1D box-transport or back-tracing trajectory codes, without a full atmospheric dynamic modelling. The trajectory tracing approach requires the wind field to be accurately known and is typically applied to case studies. We have extended the discussion and added more references (see lines 93-96).

Lines 51-52: I would assume that the knowledge of the wind field together with other meteorological parameters is a requisite for all dynamical atmospheric model, including the one presented here. Considering the temporal extension of current reanalysis (e.g., ERA5 climate reanalysis covering the period from 1950 on, or the NCEP/NCAR reanalysis from 1948 onwards), I cannot see how this actually limits the analysis of transport of beryllium isotopes, whose archives are not that longer.

Potentially, a full CCM model can be run in a self-consistent mode (without nudging to the meteorological data) and still reasonably reproduce the beryllium transport+deposition, as demonstrated by Heikkilä et al. and Sukhodolov et al. This is our forthcoming step. But first, we need to demonstrate that the model works well with the nudging and then proceed to the self-consistent mode.

Lines 59-69: This paragraph contains lot of technical data which are not fully pertinent to an Introduction section, while they should be moved to the Methods. Here you should provide a description of how the work presented here fills the gaps that you have just presented in the literature review above.

This paragraph was rewritten to emphasize the aims of the paper. However, we cannot present the results of this work in the Introduction. It is done in the subsequent sections.

17) Lines 67-69: Referring to what I suggested at the previous point, I suppose that this should be moved to the Methods. In any case, information on the kind of observed meteorological data used in the model is missing, and should be also provided.

The text has been modified (*see lines 122-124*).

18) Lines 68-69: But why you purposely chose to compare the model simulations just with measurement of  $^7\text{Be}$  (and not  $^{10}\text{Be}$ ) at high-latitude stations? There are a lot of stations measuring cosmogenic isotopes located at midlatitudes or in the tropical/equatorial regions.

The main purpose of this work is to confront the model results with high-resolution (weekly) measurements of beryllium.  $^7\text{Be}$  was chosen for two reasons: first, there is almost no high-quality  $^{10}\text{Be}$  data in air samples since measurements of  $^{10}\text{Be}$  are much more difficult than those of  $^7\text{Be}$ ; second,  $^{10}\text{Be}$  measured in ice cores contains an additional component (deposition) which is also not easy to model. On the other hand, the model eventually aims at the modelling of the  $^{10}\text{Be}$  isotope including a deposition. Since  $^{10}\text{Be}$  is typically measured at polar ice cores, we are primarily interested to validate the model for high-latitude regions. The text has been updated accordingly.

19) Lines 84-86: Is this information on the aerosol module connected with beryllium-isotopes? In the real atmosphere, there is a strong connection between  $^7\text{Be}$  and aerosol size distribution because it is known that after production  $^7\text{Be}$  rapidly attaches to submicron-sized particles, which is also very important for its removal through wet and dry deposition processes. This information is only partially provided in the text, with a partial description is given at lines 142. Better connection of these mechanisms with the way used in the model to simulate them should be provided.

The aerosol module is crucial for the proper modelling of beryllium transport, and thus, its brief description is needed for the benefit of a reader.

20) Lines 92-93: There is no version number/year indicated, so there is no way for the reader to understand where the update is, the name is just the same as at line 89.

The CRAC model does not contain the version number, it indicates the family of the model, viz. the way to model the atmospheric cascade. Each new release substitutes the earlier versions. The reference gives the unique identification of the model version.

21) Line 108: Which isotope of beryllium?

Both  $^7\text{Be}$  and  $^{10}\text{Be}$  were modelled.

22) Lines 109-110: To which time period are you referring to classify the strength of the event?

We refer to the period 1996-2008 as the “studied” period, and 1951—2020 for the “directly observed” events. The text has been clarified (*see lines 210-211*).

23) Lines 111-113: I understand that this information is from another recent paper by some of the authors, but I cannot clearly see how the shifting of the SEP event to another date can provide

information on the seasonality of beryllium transport, if no information on the different transport or stability condition occurring during these dates is provided.

We used the same SPE event with the same energy spectrum, viz. the same beryllium production pattern, for different seasons, when the actual atmospheric conditions were used. Accordingly, all the differences between panels in Figure 9 are caused by the different patterns of the atmospheric dynamics during different seasons. This forms an additional uncertainty in the relation between the SEP event strength and the expected beryllium signal. This uncertainty needs to be modelled and understood (see also Sukhodolov et al., 2017).

24) Lines 114-124: Any references for these sentences?

This comment was probably caused by our unclear writing. We now specify that this discussion is about the model results (not the measured features) shown in Figure 3. The text has been clarified (*see lines 215-218*).

25) Lines 156-160: I am not convinced that the use of a gas deposition scheme instead than an aerosol deposition scheme is correct. Indeed, even though it is true that beryllium-isotopes attach to submicron-sized particles, it is well known that while precipitation scavenging is the dominant removal mechanism for aerosols (especially fine), the same is not totally true for gaseous species.

The wet-deposition scheme uses uptake of the species by liquid water in-cloud and rain droplets below the clouds which depend on the solubility and reactivity of the component. For our study, these parameters for the beryllium isotopes were set equal to those for fine sulfate-containing aerosols. We believe that a more precise description of the wet beryllium-isotope deposition is not straightforward, because it is not clear what kind of aerosol (there are many different aerosol types in the troposphere) or ion clusters is more attractive for Be isotopes to attach to, and how to treat cases when aerosol is fully evaporated? Our approach is obviously a simplification, but the obtained results confirm the applicability of the applied method. We work on a better scheme to estimate, as our aerosol model treats interactively only sulfur-containing aerosols that is probably not sufficient for the troposphere.

26) Lines 173-180: Rephrase, not clear.

*See lines 290-298.*

27) Lines 181-188: Why are you using a multi-year mean? This way you are removing the interannual and seasonal variability. Wouldn't it better to investigate separately two seasons? Any other studies showing similar observed/simulated patterns in deposition fluxes of  $7\text{Be}$  to compare with?

This is only an illustration to show that depositions can vary by an order of magnitude for different locations.

28) Line 199: What do you mean by "caught by the air dynamics"?

The sentence is modified (*see line 315*).

29) Lines 203-208 and 209-212: Here you are describing the event from the point of view of model simulations, but is there any observations for you to document and compare your findings with? In this sense, Figure 5 shows that the  $7\text{Be}$  concentration produced by the event were probably not transported at lower atmospheric layers, since probably notwithstanding the strength of the event, there was no transport of stratospheric-upper tropospheric air to the surface (at least in the model), which explains at least partially why the modelled activity of  $7\text{Be}$  did not reach elevated values in near ground air in Finland.

The data suggest that there is no clear signal of  $^7\text{Be}$  in measurements (see also Usoskin et al., 2009), as the expected SEP-related  $^7\text{Be}$  activity is a factor 100 lower than that from GCR. This cannot be directly checked with measurements, since SEP- and GCR-produced beryllium cannot be distinguished in data. On the other hand, we do know that extreme SEP events (e.g., in 775 AD, 993 AD, 660 BC) can be clearly observed in polar  $^{10}\text{Be}$  (Mekhaldi et al., 2015; Sukhodolov et al., 2017; O'Hare et al., 2019). Thus, it is worth modelling this.

30) Line 213: As described previously, this statement is not correct. Indeed, transport depends on many factors which can be seasonally dependent, but definitely depend on other characteristics that are not the seasons. If you do not provide information on the synoptic situation of the period, there is no way to conclude definitely that the transport of e.g., midautumn differs from the one of e.g., mid-spring.

The transport of beryllium after production depends on many different factors such as QBO phase, the appearance of sudden stratospheric warmings or perturbations of the wave patterns, but the seasonal behaviour of the transport usually dominates.

31) Lines 213-223: But apart from the description of  $^7\text{Be}$  vertical cross sections in the different seasons, could you analyse the different transport mechanisms/synoptic situations occurring in the different seasons?

The main features of the transport during cold and warm seasons are well known. Synoptic situations are usually very short and sporadic considered by the model via the nudging. We do not see how they can help to understand seasonal effects.

32) Lines 228-229: I understand that data availability is an important issue for any kind of model, but the use of weekly observations, which smooths lots of physical processes dominating the variability of beryllium-isotopes concentrations in the atmosphere poses great limitation to this comparison, which should be at least cited in the text.

The problem with daily-resolved data is that it is very noisy partly due to local weather conditions e.g., local rain showers, and this is not generally captured by a model with a grid size of  $2.5 \times 2.5^\circ$ . The use of larger sampling frequency tend to average out local weather events. We found the weekly-resolution data optimal for our purposes. The text has been updated (*see lines 129-135*).

33) Lines 228-233: Any references for the description of these measurements?

This article has been cited already as Leppänen et al., 2012 (*see line 138*).

34) Lines 231-232: Please provide some additional details on the procedure to perform "standard correction for decay".

We apologize for the unclear writing. Here we refer to the standard procedure of the correction for decay which occurs between the sample collection and measurements. This is a standard correction applied to all datasets before their release and is not a part of our model (see a detailed description of the sampling and measurement procedure, e.g., in Leppänen et al., 2012 or STUK and CTBTO websites). For our model, "correction for decay" was done in section 3.2 and implies correction for decay within the model, viz. between production and deposition.

35) Line 235: Why do you use a set of stations for Finland while you use just one measuring station for the other locations. Could this then lead to a different result of the comparison?



Finland is very well covered by measurement stations operated by STUK. Thanks to that, we can combine data to cover a region comparable to the model grid cell thus avoiding very local effects. As a comparison with data shows (Figs. 1a, 2, 10a), the agreement is good. For other locations, we do not have data from such a dense regional network, since CTBTO provides data from a much sparser grid. The effect of the mismatch between the model grid and the local scale is particularly important for Kerguelen where the size of the island is significantly smaller than the model cell. Thus, we can study the effect of the grid size.

36) Lines 228-264: Here the text comprehends also description of the measurement methods, which should be provided in a different (previous) section than this one.

The text has been restructured as proposed by the Reviewer.

37) Lines 247-248: As reported previously, the weekly information actually smooths the original signal, so I believe it could be important for the authors to show whether the model is able to catch the daily pattern of observations or not.

See our reply to items 12 and 32 above.

38) Lines 267-268 and below: The significance level and the value of the correlation coefficient provide information on the temporal coherence between the observed and simulated beryllium patterns, but does not provide information on the presence of a bias between observations and simulations. Below you provide a comparison between overall simulated and observed mean, but again this does not provide a true measure of bias. Please consider the inclusion of additional parameters for the comparison.

A new Figure 11 with the distribution of residuals is included (see also our reply to general comments above). The analysis shows that the null hypothesis of no bias cannot be rejected at any sensible statistical level, implying effectively that the model does not produce any significant bias.

39) Line 273: Considering that the paper from Brattich et al. (2020) focuses on a mid-latitude high-altitude station, I doubt that there is any references in this paper with SSW events.

We apologize for the typo with the wrong reference. The correct reference is Brattich et al., 2021, where the effect of SSW is discussed.

40) Lines 274-276 and below: Could you include a comparison of simulated and observed standard deviations?

The standard deviations (in units of mBq/m<sup>3</sup>) of the simulated/observed weekly data are: 0.97/1.04 for Finland, 1.78/1.87 for Canada, 0.35/0.5 for Chile, and 0.38/0.48 for Kerguelen. The standard deviations are, of course, larger for Finnish and Canadian locations where the variability is dominated by the seasonal cycle, and smaller for Chilean and Kerguelen locations where it represents the synoptic noise. In all cases, the difference is 0.1-0.15 mBq/m<sup>3</sup>. A clearer picture is shown in the new *Figure 11*.

Lines 277-279: Could you explain better why you suppose that such discrepancies between model and observations relate with atmospheric aerosol properties, especially since you described previously that you applied a gaseous deposition scheme? Couldn't the difference be related with a problem in the meteorological field (wind, precipitation, ...)? In any case, what do you mean by "anomalies" in the "atmospheric aerosol properties"?



The applied deposition scheme is based on the sulfate aerosol properties, but if  $^7\text{Be}$  is attached to other kinds of particles presenting in the troposphere the deposition and transport can be rather different leading to some inaccuracy of the simulations. Of course, the problem with the transport modelling and meteorological fields are also important.

The word “anomalies” in the “atmospheric aerosol properties” is related to the scale of aerosol optical depth which is a measure of the extinction of the solar beam by the dust and haze. So, particles in the atmosphere (dust, smoke, pollution, volcanic activity) can block sunlight by absorbing or by scattering the light.

42) Lines 287-288 and 293: The absence of a seasonal pattern in the observed time series is not a justification of the absence of correlation between measurements and simulations (also, please note that the significance of the correlation, like of any other statistical parameters, is provided by the p-value, and not by the value of the coefficient) by itself, while it suggests that the model does not reproduce correctly the observed time pattern at these two stations, contradicting the statement in the text

We always provide the p-value for correlation coefficients. The signal at each site is composed of the annual cycle and the short-scale synoptic variability. The model correctly reproduces the presence (or absence) of the annual cycle but can deviate from the data for the high-frequency noise. Thus, the correlation is high and significant for sites with the dominant annual cycle but low for sites without this cycle. However, the cross-correlation coefficient is confusing since it mixes up all frequency/time scales and mostly represents the dominant one (e.g., the annual cycle for the northern hemisphere). More representative is the coherence (Fig. 10), which localizes the “correlation” at different frequencies (time scales). It is obvious from the Figure that the time variability of  $^7\text{Be}$  is correctly reproduced at the annual and sub-annual scale for all stations (coherence at 1-year scale is always highly significant being  $\sim 0.9$ ).

43) You talk about “orography” but how high is the sampling site? Did you compare model topography with real data?

The model has 39 vertical levels between the Earth’s surface and the 0.01 hPa level ( $\approx 80$  km). We used the lowest model level (the Earth’s surface). The model grid size is larger than the size of the Kerguelen island, thus the model cannot correctly catch their spatial scale.

44) Lines 298-299: Based on the reasonings provided above, it seems that the model reproduces correctly the patterns in the northern hemisphere, while the capability is more limited in the southern hemisphere, which may be related with additional factors than the orography and the spatial resolution (which should apply to all stations but in Finland where a set of different stations was used

We agree with this statement which correctly summarizes our results. On the other hand, we want to emphasize that the annual and sub-annual variability is always correctly reproduced (see Fig. 10) as well as the overall level, by the model.

45) Figure 8: The figure shows very clearly how the model is able to catch the overall pattern, but is affected by some biases in reproducing some episodes, like for instance: a consistent overestimation for 2008 in Finland; a consistent underestimation of 2007 data in Finland; a period of underestimation in 2008 in Canada; general disagreement of the patterns for Chile and Kerguelen data. All these disagreements are not totally caught by the statistical parameters presented in the discussion, but need thorough investigation and discussion

We agree that the model has some periods of not perfect reproduction of the data even for the Northern hemisphere, but statistically, the general pattern is very well caught (see Figures 10 and 11). Quantitative analysis (Fig.10) implies that the agreement is highly significant (at least at the time scales longer than 6 months) and has no essential biases (*Figure 11*). We recall that we are primarily interested in this annual/interannual time scale. The text has been clarified (*lines 369-371, 374-379*).

46) Figure 9: Also deposition data show similar disagreement not caught by the presented statistical parameters, and are not investigated.

The situation is similar to that discussed in item 45 above. Although each individual year is not perfectly reproduced, the main annual cycle is correctly reproduced in a statistical sense. In particular, the mean difference between modelled and measured values is only 4.7 Bq/m<sup>2</sup> (~4%), as shown in the plot below.

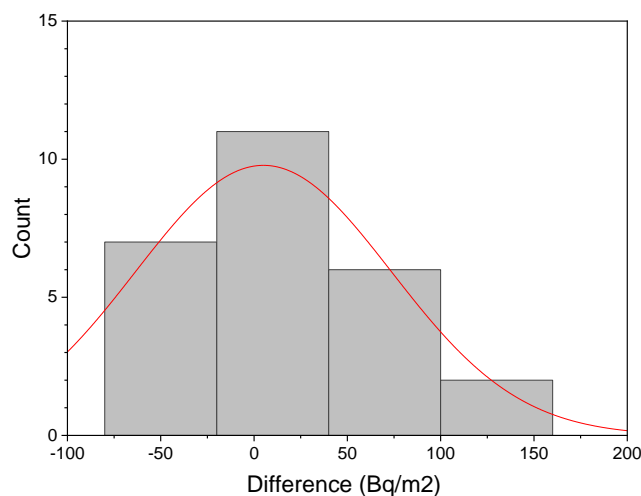

47) Figure 10: The comparison of wavelet coherence between modeled and observed data is not sufficiently explained in the text, therefore the reader cannot properly understand the meaning of the panels.

The description of the wavelet coherence has been extended. *Lines 342-354*.

48) Lines 309-310: You have presented results only for <sup>7</sup>Be, so I am wondering you can claim the validity for all cosmogenic beryllium isotopes.

Different isotopes of beryllium (<sup>7</sup>Be and <sup>10</sup>Be) are supposed to be transported in the atmosphere in similar ways (see, e.g., works by Heikkilä et al.). Accordingly, the results obtained for <sup>7</sup>Be are suggestive also for <sup>10</sup>Be. On the other hand, this is only a suggestion.

49) Line 315: I cannot see any error bars in the figures about comparison of the model with the observations.

We apologize for unclear writing confusing a reader. In this sentence we mean not the uncertainties of the measurements that are of the order of 7-8 %, but the standard deviation of the difference between modelled and measured activities (*Figure 11*).

50) Lines 316-317: Again, you talk about orography but there is no description of the model representation of the topography.

The real orography is smoothed for our grid cells (approximately 300x300 km). Therefore, local small-scale features cannot be well reproduced.

51) Lines 317-319: Based on my comments above, this sentence needs thorough revision.

The sentence has been reformulated to be more precise. See lines 400-403.

52) Lines 324-325: Again, I suppose that the fact that you are not able to observe this event at near-ground is related more with the absence of transport from the stratosphere-upper troposphere than with the strength of the event.

Both the lack of fast vertical transport, leading to decay of the stratospheric  $^7\text{Be}$  before it can reach the ground, and the strength of the event affects the detectability of a SEP-related signal in the near-ground air. As one can see from Fig. 8, an x100 stronger event would double the  $^7\text{Be}$  activity in Finland within 10-20 days, which would have been clearly measured.

53) Code and data availability: from the statement it is not clear that the observations used in this work are not freely available. Indeed, the website at STUK present a service price list, which probably means that the reader has to pay if wants to obtain the data, while data from the CTBTO seem to be available upon request (I did not proceed, so I cannot confirm that they are available for free upon request). To me, this seems in contrast with that the Code and data policy of the GMD journal (available at: [https://www.geoscientific-modeldevelopment.net/policies/code\\_and\\_data\\_policy.html](https://www.geoscientific-modeldevelopment.net/policies/code_and_data_policy.html)), which explicitly states that the data and other information underpinning the research findings are “findable, accessible, interoperable, and reusable” (FAIR). Regarding the licence of the model, it is not clear whether they are conform to the Open Source Definition. In addition, the document also states that: “Where the authors cannot, for reasons beyond their control, publicly archive part or all of the code and data associated with a paper, they must clearly state the restrictions. They must also provide confidential access to the code and data for the editor and reviewers in order to enable peer review. The arrangements for this access must not compromise the anonymity of the reviewers. All manuscripts which do not make code and data available at this level are to be rejected. Where only part of the code or data is subject to these restrictions, the remaining code and/or data must still be publicly archived. In particular, authors must make every endeavour to publish any code whose development is described in the manuscript. Code and data access must be provided at the time that the discussion paper is submitted. Embargoes, whether pending acceptance or for a defined period, are not acceptable.

We have clarified the data statement now. See *Data availability*.

1. the source code for the complete model or module or other coded product described in the paper (must be provided for model description, development and technical, and methods for assessment paper types);
2. the manual and any other model documentation (applies to model description, development and technical, and methods for assessment, to the extent the editor considers applicable);
3. all configuration files, boundary conditions, and input data (must be provided for experiment description papers and any other papers in which results from model runs are reported);
4. data sets for forcing of models or comparison with model output (must be provided for papers describing such data sets or for papers in which model output are compared with such data);
5. preprocessing, run control and postprocessing scripts covering every data processing action for all the results reported in the paper (applies for all papers, to the extent the editor considers applicable).”

All files are uploaded to Zenodo <https://doi.org/10.5281/zenodo.5006356>.
